# Supplementary material
Source: publisher figshare collection journal article supplement (https://acs.figshare.com/ndownloader/files/6964151)
Supplement: Supplementary file 1 [file 6964151]

## Sheet: reduction and alkylation
	no reduction and alkylation reaction				no reduction and alkylation reaction				no reduction and alkylation reaction				reduction and alkylation reaction				reduction and alkylation reaction				reduction and alkylation reaction
GeneSymbol	GeneID	Areas		GeneSymbol	GeneID	Areas		GeneSymbol	GeneID	Areas		GeneSymbol	GeneID	Areas		GeneSymbol	GeneID	Areas		GeneSymbol	GeneID	Areas
ARNT	GeneID:405	14000000		ARNT	GeneID:405	9300000		ARNT	GeneID:405	16000000		ARNT	GeneID:405			ARNT	GeneID:405	5300000		E2F3	GeneID:1871	16000000
BHLHE40	GeneID:8553	12000000		E2F3	GeneID:1871	15000000		BHLHE40	GeneID:8553	9800000		E2F3	GeneID:1871	11000000		E2F3	GeneID:1871	11000000		GATA1	GeneID:2623	9100000
DR1	GeneID:1810	28000000		ETV6	GeneID:2120	7700000		DR1	GeneID:1810	38000000		HMGB1	GeneID:3146	180000000		ETV6	GeneID:2120	2700000		HMGB1	GeneID:3146	190000000
E2F3	GeneID:1871	22000000		HMGB1	GeneID:3146	310000000		E2F3	GeneID:1871	27000000		HMGA2	GeneID:8091	110000000		HMGB1	GeneID:3146	170000000		HMGA2	GeneID:8091	190000000
ETV6	GeneID:2120	10000000		HMGA2	GeneID:8091	400000000		ETV6	GeneID:2120	14000000		MYBL2	GeneID:4605	4600000		HMGA2	GeneID:8091	170000000		MEIS1	GeneID:4211	8000000
HMGB1	GeneID:3146	420000000		MEIS1	GeneID:4211	12000000		HMGB1	GeneID:3146	470000000		NFYA	GeneID:4800	40000000		MEIS1	GeneID:4211	4600000		MYBL2	GeneID:4605	20000000
HMGA2	GeneID:8091	560000000		MYBL2	GeneID:4605	8300000		HMGA2	GeneID:8091	400000000		PBX1	GeneID:5087	15000000		MYBL2	GeneID:4605	21000000		NFYA	GeneID:4800	91000000
MEIS1	GeneID:4211	19000000		NFYA	GeneID:4800	170000000		ID4	GeneID:3400	1500000		RXRA	GeneID:6256	23000000		NFYA	GeneID:4800	66000000		PBX1	GeneID:5087	25000000
MYBL2	GeneID:4605	15000000		PBX1	GeneID:5087	57000000		MEIS1	GeneID:4211	24000000		SKI	GeneID:6497	6000000		PBX1	GeneID:5087	7700000		RXRA	GeneID:6256	52000000
NFYA	GeneID:4800	160000000		RXRA	GeneID:6256	51000000		MYBL2	GeneID:4605	40000000		SSRP1	GeneID:6749	510000000		RXRA	GeneID:6256	27000000		SKI	GeneID:6497	12000000
PBX1	GeneID:5087	65000000		SKI	GeneID:6497	11000000		NFYA	GeneID:4800	150000000		TBP	GeneID:6908	3200000		SKI	GeneID:6497	8100000		SSRP1	GeneID:6749	110000000
RFXANK	GeneID:8625	7500000		SSRP1	GeneID:6749	150000000		PBX1	GeneID:5087	46000000		TFAM	GeneID:7019	98000000		SRF	GeneID:6722	2200000		TBP	GeneID:6908	35000000
RXRA	GeneID:6256	52000000		TAL1	GeneID:6886	11000000		RXRA	GeneID:6256	60000000		TFAP4	GeneID:7023	13000000		SSRP1	GeneID:6749	250000000		TFAM	GeneID:7019	130000000
SKI	GeneID:6497	18000000		TBP	GeneID:6908	54000000		SKI	GeneID:6497	18000000		USF2	GeneID:7392	8700000		TBP	GeneID:6908	41000000		TFAP2A	GeneID:7020	9900000
SSRP1	GeneID:6749	150000000		TFAM	GeneID:7019	270000000		SRF	GeneID:6722	5100000		YY1	GeneID:7528	190000000		TFAM	GeneID:7019	110000000		TFAP4	GeneID:7023	26000000
TBP	GeneID:6908	75000000		TFAP2A	GeneID:7020	14000000		SSRP1	GeneID:6749	130000000		NKX2-5	GeneID:1482	9800000		TFAP2A	GeneID:7020	16000000		USF2	GeneID:7392	24000000
TFAM	GeneID:7019	270000000		TFAP4	GeneID:7023	13000000		TBP	GeneID:6908	73000000		ATF1	GeneID:466	7700000		TFAP4	GeneID:7023	25000000		YY1	GeneID:7528	200000000
TFAP2A	GeneID:7020	14000000		USF2	GeneID:7392	41000000		TFAM	GeneID:7019	310000000		ARID3A	GeneID:1820	68000000		USF2	GeneID:7392	11000000		NKX2-5	GeneID:1482	19000000
TFAP2C	GeneID:7022	3500000		YY1	GeneID:7528	150000000		TFAP2A	GeneID:7020	30000000		SMAD4	GeneID:4089	19000000		YY1	GeneID:7528	260000000		DLX2	GeneID:1746	45000000
TFAP4	GeneID:7023	22000000		FOXF2	GeneID:2295	8200000		TFAP2C	GeneID:7022	5600000		TP73	GeneID:7161	19000000		NKX2-5	GeneID:1482	12000000		ATF1	GeneID:466	8900000
USF2	GeneID:7392	55000000		PDX1	GeneID:3651	4000000		TFAP4	GeneID:7023	29000000		HMGN2	GeneID:3151	350000000		DLX2	GeneID:1746	18000000		ARID3A	GeneID:1820	75000000
YY1	GeneID:7528	270000000		NKX2-5	GeneID:1482	16000000		USF2	GeneID:7392	64000000		NAB2	GeneID:4665	11000000		HSF2	GeneID:3298	5400000		SMAD4	GeneID:4089	19000000
KLF9	GeneID:687	5100000		DLX2	GeneID:1746	49000000		YY1	GeneID:7528	310000000		SIX1	GeneID:6495	2000000		ATF1	GeneID:466	3600000		TP73	GeneID:7161	7600000
FOXF2	GeneID:2295	5800000		HSF2	GeneID:3298	6200000		FOXF2	GeneID:2295	4600000		CTCF	GeneID:10664	7300000		ARID3A	GeneID:1820	55000000		HMGN2	GeneID:3151	95000000
NKX2-5	GeneID:1482	20000000		ATF1	GeneID:466	4300000		SOX9	GeneID:6662			YEATS4	GeneID:8089	39000000		SMAD4	GeneID:4089	18000000		HES1	GeneID:3280	1000000
DLX2	GeneID:1746	57000000		ARID3A	GeneID:1820	63000000		NKX2-5	GeneID:1482	24000000		ZNF217	GeneID:7764			TP73	GeneID:7161	10000000		NR2F1	GeneID:7025	13000000
HSF2	GeneID:3298	6600000		ZBTB48	GeneID:3104			ATF1	GeneID:466	26000000		WDHD1	GeneID:11169	12000000		HMGN2	GeneID:3151	87000000		SMAD3	GeneID:4088	20000000
SIM2	GeneID:6493	10000000		SMAD4	GeneID:4089	30000000		ARID3A	GeneID:1820	92000000		TFDP1	GeneID:7027	12000000		SMAD3	GeneID:4088	50000000		SIX1	GeneID:6495	20000000
ATF1	GeneID:466	17000000		TP73	GeneID:7161	9900000		ZBTB48	GeneID:3104	8900000		STAT1	GeneID:6772	7800000		MEF2D	GeneID:4209	12000000		CTCF	GeneID:10664	31000000
ARID3A	GeneID:1820	76000000		HMGN2	GeneID:3151	900000000		SMAD4	GeneID:4089	39000000		GMEB2	GeneID:26205			SIX1	GeneID:6495	17000000		YEATS4	GeneID:8089	9400000
SMAD4	GeneID:4089	30000000		HES1	GeneID:3280	2100000		TP73	GeneID:7161	6900000		ZNF281	GeneID:23528	28000000		NFYB	GeneID:4801	30000000		ZNF217	GeneID:7764	2700000
TP73	GeneID:7161	6700000		NR2F1	GeneID:7025	39000000		HMGN2	GeneID:3151	200000000		PDS5B	GeneID:23047	83000000		PBX3	GeneID:5090	5600000		WDHD1	GeneID:11169	1200000
HMGN2	GeneID:3151	130000000		SMAD3	GeneID:4088	4200000		HES1	GeneID:3280	3200000		TFCP2L1	GeneID:29842	23000000		CTCF	GeneID:10664	38000000		TFDP1	GeneID:7027	25000000
HES1	GeneID:3280	4100000		MEF2D	GeneID:4209	33000000		HSF1	GeneID:3297	3600000		ZNF516	GeneID:9658	13000000		WDHD1	GeneID:11169	2300000		ELF2	GeneID:1998	47000000
NR2F1	GeneID:7025	54000000		NAB2	GeneID:4665	17000000		NR2F1	GeneID:7025	20000000		ZNF536	GeneID:9745			TFDP1	GeneID:7027	30000000		ZNF281	GeneID:23528	22000000
SMAD3	GeneID:4088	29000000		SIX1	GeneID:6495	24000000		SMAD3	GeneID:4088	16000000		TOX4	GeneID:9878	37000000		ELF2	GeneID:1998	53000000		PDS5B	GeneID:23047	36000000
MEF2D	GeneID:4209	21000000		NFYB	GeneID:4801	21000000		NAB2	GeneID:4665	16000000		EN2	GeneID:2020	5200000		ZNF281	GeneID:23528	47000000		TFCP2L1	GeneID:29842	62000000
NAB2	GeneID:4665	21000000		PBX3	GeneID:5090	13000000		SIX1	GeneID:6495	29000000		HMG20A	GeneID:10363	33000000		FLI1	GeneID:2313	1300000		UBTF	GeneID:7343	31000000
SIX1	GeneID:6495	35000000		CTCF	GeneID:10664	63000000		NFYB	GeneID:4801	49000000		FOXJ2	GeneID:55810			PDS5B	GeneID:23047	64000000		ZNF516	GeneID:9658	12000000
MXD4	GeneID:10608			YEATS4	GeneID:8089	32000000		PBX3	GeneID:5090	20000000		HMGN4	GeneID:10473	7100000		TFCP2L1	GeneID:29842	52000000		ZNF536	GeneID:9745	1100000
NFYB	GeneID:4801	50000000		ZNF217	GeneID:7764	2700000		CTCF	GeneID:10664	96000000		CDC5L	GeneID:988	220000000		UBTF	GeneID:7343	540000000		ZEB2	GeneID:9839	7200000
PBX3	GeneID:5090	20000000		ATF7	GeneID:11016	5800000		YEATS4	GeneID:8089	45000000		CBFB	GeneID:865	5700000		ZNF516	GeneID:9658	6500000		TOX4	GeneID:9878	43000000
POU3F3	GeneID:5455	7200000		TFDP1	GeneID:7027	19000000		ZNF217	GeneID:7764	5000000		KIN	GeneID:22944	34000000		ZNF536	GeneID:9745			ZHX2	GeneID:22882	4300000
CTCF	GeneID:10664	81000000		STAT1	GeneID:6772	5700000		ATF7	GeneID:11016	7600000		NOC4L	GeneID:79050	34000000		ZEB2	GeneID:9839	6200000		ZNF510	GeneID:22869	11000000
YEATS4	GeneID:8089	38000000		ELF2	GeneID:1998	81000000		TFDP1	GeneID:7027	52000000		KLF16	GeneID:83855	29000000		TOX4	GeneID:9878	37000000		ZBTB7A	GeneID:51341	14000000
ZNF217	GeneID:7764	3700000		ZNF281	GeneID:23528	83000000		ELF2	GeneID:1998	85000000		MTA2	GeneID:9219	160000000		ZHX2	GeneID:22882	15000000		TFE3	GeneID:7030	6200000
ATF7	GeneID:11016	11000000		FLI1	GeneID:2313	2800000		ZNF281	GeneID:23528	120000000		NR2F2	GeneID:7026	34000000		ZNF510	GeneID:22869			HMG20A	GeneID:10363	67000000
WDHD1	GeneID:11169			PDS5B	GeneID:23047	51000000		FLI1	GeneID:2313	5400000		PATZ1	GeneID:23598	17000000		ZBTB7A	GeneID:51341	10000000		FOXJ2	GeneID:55810	3500000
TFDP1	GeneID:7027	38000000		UBTF	GeneID:7343	44000000		PDS5B	GeneID:23047	47000000		HOXB9	GeneID:3219	14000000		HMG20A	GeneID:10363	45000000		FOXO1	GeneID:2308	5700000
ELF2	GeneID:1998	78000000		ZNF516	GeneID:9658	31000000		TFCP2L1	GeneID:29842	7700000		ZKSCAN4	GeneID:387032	6300000		FOXJ2	GeneID:55810	3800000		MNT	GeneID:4335	22000000
GMEB2	GeneID:26205			ZEB2	GeneID:9839	49000000		UBTF	GeneID:7343	110000000		DRAP1	GeneID:10589	57000000		ZNF395	GeneID:55893	17000000		HMGN4	GeneID:10473	3700000
ZNF281	GeneID:23528	93000000		TOX4	GeneID:9878	38000000		ZNF516	GeneID:9658	29000000		ESRRA	GeneID:2101	43000000		MNT	GeneID:4335	19000000		CDC5L	GeneID:988	67000000
FLI1	GeneID:2313	1900000		ZHX2	GeneID:22882	9800000		ZNF536	GeneID:9745	3900000		RFX3	GeneID:5991			CDC5L	GeneID:988	87000000		CBFB	GeneID:865	3300000
PDS5B	GeneID:23047	70000000		ZBTB7A	GeneID:51341	25000000		ST18	GeneID:9705	38000000		CREB1	GeneID:1385	53000000		RXRB	GeneID:6257	38000000		KIN	GeneID:22944	7900000
TFCP2L1	GeneID:29842	2600000		EN2	GeneID:2020	8900000		ZEB2	GeneID:9839	45000000		NR2F6	GeneID:2063	15000000		KIN	GeneID:22944	8500000		NOC4L	GeneID:79050	16000000
UBTF	GeneID:7343	110000000		HMG20A	GeneID:10363	47000000		TOX4	GeneID:9878	56000000		NOC3L	GeneID:64318	6100000		NOC4L	GeneID:79050	47000000		GMEB1	GeneID:10691	1900000
ZNF516	GeneID:9658	20000000		FOXJ2	GeneID:55810	7100000		ZNF432	GeneID:9668	4500000		SMARCA1	GeneID:6594	58000000		TCF7L1	GeneID:83439	1500000		TCF7L1	GeneID:83439
ZNF536	GeneID:9745	4300000		ZNF395	GeneID:55893	17000000		ZHX2	GeneID:22882	14000000		GATAD2B	GeneID:57459	100000000		KLF16	GeneID:83855	49000000		KLF16	GeneID:83855	110000000
ZEB2	GeneID:9839	16000000		MNT	GeneID:4335	22000000		ZBTB7A	GeneID:51341	34000000		SMARCC2	GeneID:6601	61000000		MTA2	GeneID:9219	73000000		MTA2	GeneID:9219	97000000
TOX4	GeneID:9878	40000000		HMGN4	GeneID:10473	14000000		EN2	GeneID:2020	6500000		SMARCE1	GeneID:6605	56000000		NR2F2	GeneID:7026	100000000		NR2F2	GeneID:7026	18000000
ZHX2	GeneID:22882	13000000		CDC5L	GeneID:988	100000000		HMG20A	GeneID:10363	54000000		ARID1A	GeneID:8289	53000000		PATZ1	GeneID:23598	12000000		PATZ1	GeneID:23598	18000000
ZBTB7A	GeneID:51341	32000000		RXRB	GeneID:6257	74000000		FOXJ2	GeneID:55810	8100000		EZH2	GeneID:2146	5900000		HOXB9	GeneID:3219			HOXB9	GeneID:3219	26000000
PRRX2	GeneID:51450			NOC4L	GeneID:79050	26000000		ZNF395	GeneID:55893	34000000		TFCP2	GeneID:7024	110000000		ZKSCAN4	GeneID:387032	7900000		ZFP91	GeneID:80829	5500000
EN2	GeneID:2020	6600000		TCF7L1	GeneID:83439			BATF3	GeneID:55509			MAX	GeneID:4149	37000000		DRAP1	GeneID:10589	48000000		ZKSCAN4	GeneID:387032	20000000
HMG20A	GeneID:10363	69000000		KLF16	GeneID:83855	130000000		FOXO1	GeneID:2308	8600000		GCFC1	GeneID:94104	79000000		ESRRA	GeneID:2101	30000000		TBX1	GeneID:6899	2700000
ZNF446	GeneID:55663	5500000		MTA2	GeneID:9219	180000000		MNT	GeneID:4335	26000000		HMGA1	GeneID:3159	230000000		CREB1	GeneID:1385	19000000		DRAP1	GeneID:10589	31000000
FOXJ2	GeneID:55810	8600000		NR2F2	GeneID:7026	42000000		HMGN4	GeneID:10473	24000000		HMGA1	GeneID:3159	320000000		NR2F6	GeneID:2063	29000000		ESRRA	GeneID:2101	44000000
ZNF395	GeneID:55893	7500000		KLF5	GeneID:688	8400000		CDC5L	GeneID:988	130000000		NFRKB	GeneID:4798	18000000		NOC3L	GeneID:64318	9400000		CREB1	GeneID:1385	42000000
FOXO1	GeneID:2308	6700000		PATZ1	GeneID:23598	32000000		RXRB	GeneID:6257	82000000		ZNF280C	GeneID:55609			SMARCA1	GeneID:6594	35000000		NAB1	GeneID:4664	1500000
MNT	GeneID:4335	27000000		HOXB9	GeneID:3219	23000000		E2F1	GeneID:1869	3500000		ZNF687	GeneID:57592	28000000		GATAD2B	GeneID:57459	94000000		NFATC1	GeneID:4772	43000000
HMGN4	GeneID:10473	21000000		ZFP91	GeneID:80829			CBFB	GeneID:865	6400000		MLX	GeneID:6945	11000000		SMARCC2	GeneID:6601	18000000		NR2F6	GeneID:2063	24000000
HES4	GeneID:57801	4600000		ZKSCAN4	GeneID:387032	29000000		KIN	GeneID:22944	9300000		PBX2	GeneID:5089	26000000		SMARCE1	GeneID:6605	14000000		BCL11A	GeneID:53335	5100000
CDC5L	GeneID:988	130000000		DRAP1	GeneID:10589	33000000		NOC4L	GeneID:79050	41000000		NFATC1	GeneID:4772	6400000		ARID1A	GeneID:8289	18000000		NOC3L	GeneID:64318	2800000
E2F1	GeneID:1869	3700000		ESRRA	GeneID:2101	49000000		HOXB8	GeneID:3218	2300000		ZZZ3	GeneID:26009	11000000		EZH2	GeneID:2146	7200000		SMARCA1	GeneID:6594	17000000
CBFB	GeneID:865	8200000		CREB1	GeneID:1385	62000000		GMEB1	GeneID:10691	13000000		FOXK2	GeneID:3607	15000000		TFCP2	GeneID:7024	110000000		KLF12	GeneID:11278	2000000
KIN	GeneID:22944	7200000		RUNX1	GeneID:861	13000000		TCF7L1	GeneID:83439	4200000		ADNP	GeneID:23394	43000000		ZNF296	GeneID:162979	3000000		GATAD2B	GeneID:57459	86000000
NOC4L	GeneID:79050	49000000		NAB1	GeneID:4664			KLF16	GeneID:83855	170000000		ZNF512B	GeneID:57473	25000000		MAX	GeneID:4149	46000000		SMARCC2	GeneID:6601	22000000
HOXB8	GeneID:3218	1800000		NR2F6	GeneID:2063	33000000		MTA2	GeneID:9219	170000000		YBX1	GeneID:4904	77000000		GCFC1	GeneID:94104	61000000		SMARCE1	GeneID:6605	17000000
GMEB1	GeneID:10691	3500000		HMGN3	GeneID:9324	87000000		NR2F2	GeneID:7026	99000000		RBL1	GeneID:5933	12000000		HMGA1	GeneID:3159	230000000		ARID1A	GeneID:8289	12000000
TCF7L1	GeneID:83439	8400000		NOC3L	GeneID:64318	8700000		KLF5	GeneID:688	9600000		NR2C2	GeneID:7182	34000000		HMGA1	GeneID:3159	320000000		EZH2	GeneID:2146	12000000
KLF16	GeneID:83855	150000000		SMARCA1	GeneID:6594	3700000		MLXIPL	GeneID:51085	9700000		SP1	GeneID:6667	34000000		ZBTB9	GeneID:221504	5500000		TFCP2	GeneID:7024	140000000
MTA2	GeneID:9219	210000000		KLF12	GeneID:11278	9900000		PATZ1	GeneID:23598	43000000		SP3	GeneID:6670	51000000		NFRKB	GeneID:4798	23000000		ZKSCAN5	GeneID:23660	30000000
NR2F2	GeneID:7026	140000000		GATAD2B	GeneID:57459	120000000		RARB	GeneID:5915	39000000		BPTF	GeneID:2186	50000000		HOXB6	GeneID:3216	27000000		STAT3	GeneID:6774	3800000
PATZ1	GeneID:23598	40000000		SMARCC2	GeneID:6601	37000000		HOXB9	GeneID:3219	38000000		PRDM10	GeneID:56980	3400000		ZNF280C	GeneID:55609	8100000		MAX	GeneID:4149	50000000
HOXD8	GeneID:3234	5800000		SMARCE1	GeneID:6605	25000000		TRERF1	GeneID:55809			ELF2	GeneID:1998	3300000		ZNF687	GeneID:57592	17000000		GCFC1	GeneID:94104	44000000
HOXB9	GeneID:3219	38000000		ARID1A	GeneID:8289	13000000		ZKSCAN4	GeneID:387032	35000000		RBPJ	GeneID:3516	48000000		ZBTB2	GeneID:57621	7300000		DOT1L	GeneID:84444
ZKSCAN4	GeneID:387032	33000000		TFCP2	GeneID:7024	120000000		GATA5	GeneID:140628			TBX3	GeneID:6926			HOXA5	GeneID:3202	6900000		HMGA1	GeneID:3159	320000000
DRAP1	GeneID:10589	44000000		ZNF296	GeneID:162979	890000		DRAP1	GeneID:10589	46000000		SMAD5	GeneID:4090	29000000		HOXC9	GeneID:3225	16000000		HMGA1	GeneID:3159	310000000
ESRRA	GeneID:2101	58000000		MAX	GeneID:4149	21000000		ESRRA	GeneID:2101	91000000		HMGN1	GeneID:3150	4700000		MLX	GeneID:6945	5600000		ZIC2	GeneID:7546	10000000
RFX2	GeneID:5990			ISL2	GeneID:64843	7200000		RFX2	GeneID:5990	1000000		SALL2	GeneID:6297	16000000		PBX2	GeneID:5089	18000000		ZBTB9	GeneID:221504	12000000
RFX3	GeneID:5991	810000		GCFC1	GeneID:94104	27000000		RFX3	GeneID:5991	38000000		MTA3	GeneID:57504	12000000		NFATC1	GeneID:4772	37000000		NFRKB	GeneID:4798	24000000
CREB1	GeneID:1385	20000000		DOT1L	GeneID:84444	7200000		CREB1	GeneID:1385	91000000		RREB1	GeneID:6239	16000000		MSX2	GeneID:4488	14000000		HOXB6	GeneID:3216	27000000
NR2F6	GeneID:2063	60000000		HMGA1	GeneID:3159	540000000		RUNX1	GeneID:861	9700000		HMGXB4	GeneID:10042	18000000		NFATC3	GeneID:4775	5000000		ZNF280C	GeneID:55609	5600000
BCL11A	GeneID:53335	4500000		HMGA1	GeneID:3159	550000000		NR2F6	GeneID:2063	64000000		TERF2IP	GeneID:54386	27000000		PKNOX1	GeneID:5316	2900000		ZNF687	GeneID:57592	32000000
NOC3L	GeneID:64318	7900000		ZBTB9	GeneID:221504	13000000		GLI4	GeneID:2738	6100000		CHD7	GeneID:55636	69000000		ZZZ3	GeneID:26009	7700000		ZBTB2	GeneID:57621	7600000
SMARCA1	GeneID:6594	21000000		NFRKB	GeneID:4798	39000000		BCL11A	GeneID:53335			ALX4	GeneID:60529			ZNF606	GeneID:80095			HOXA5	GeneID:3202	9200000
KLF12	GeneID:11278	9200000		HOXB6	GeneID:3216	44000000		NOC3L	GeneID:64318	6800000		ZKSCAN1	GeneID:7586	7900000		FOXK2	GeneID:3607	46000000		HOXC9	GeneID:3225	5100000
GATAD2B	GeneID:57459	130000000		ZNF521	GeneID:25925	12000000		SMARCA1	GeneID:6594	22000000		VEZF1	GeneID:7716	5400000		ADNP	GeneID:23394	31000000		MLX	GeneID:6945	17000000
SMARCC2	GeneID:6601	48000000		ZNF280C	GeneID:55609	10000000		KLF12	GeneID:11278	9600000		ARID2	GeneID:196528	47000000		TCF20	GeneID:6942			MEIS2	GeneID:4212
SMARCE1	GeneID:6605	36000000		ZNF687	GeneID:57592	43000000		GATAD2B	GeneID:57459	98000000		FOXP4	GeneID:116113	27000000		GATA4	GeneID:2626	15000000		ELF1	GeneID:1997	5700000
ARID1A	GeneID:8289	20000000		HOXA5	GeneID:3202	12000000		SMARCC2	GeneID:6601	37000000		ZHX1	GeneID:11244	6700000		ZNF512B	GeneID:57473	76000000		PBX2	GeneID:5089	23000000
EZH2	GeneID:2146	7200000		HOXC4	GeneID:3221			SMARCE1	GeneID:6605	5300000000		E4F1	GeneID:1877	7600000		YBX1	GeneID:4904	44000000		ZSCAN21	GeneID:7589	6400000
TFCP2	GeneID:7024	170000000		HOXC9	GeneID:3225	9000000		ARID1A	GeneID:8289	17000000		RFX5	GeneID:5993	15000000		NR2C2	GeneID:7182	51000000		MSX2	GeneID:4488	24000000
STAT3	GeneID:6774	5700000		MLX	GeneID:6945	24000000		EZH2	GeneID:2146	7900000		HMGB3	GeneID:3149	180000000		KLF13	GeneID:51621	6600000		NFATC3	GeneID:4775	9700000
ZNF296	GeneID:162979	1800000		ELF1	GeneID:1997	7100000		TFCP2	GeneID:7024	190000000		DMAP1	GeneID:55929	26000000		SP1	GeneID:6667	44000000		PKNOX1	GeneID:5316	34000000
ZNF558	GeneID:148156	2800000		PBX2	GeneID:5089	57000000		STAT3	GeneID:6774	6300000		FOXK1	GeneID:221937	220000000		SP3	GeneID:6670	76000000		CHD6	GeneID:84181	3100000
MAX	GeneID:4149	31000000		NFATC1	GeneID:4772	82000000		MAX	GeneID:4149	57000000		HMG20B	GeneID:10362	30000000		BPTF	GeneID:2186	52000000		ZZZ3	GeneID:26009	13000000
ISL2	GeneID:64843	18000000		ZSCAN21	GeneID:7589	8100000		ISL2	GeneID:64843	10000000		MNX1	GeneID:3110	20000000		GATA6	GeneID:2627	81000000		ZNF263	GeneID:10127	1200000
POGK	GeneID:57645	9200000		TCF3	GeneID:6929	290000		POGK	GeneID:57645	4900000		TRPS1	GeneID:7227	11000000		ZFP64	GeneID:55734	13000000		FOXK2	GeneID:3607	46000000
GCFC1	GeneID:94104	56000000		MSX2	GeneID:4488	11000000		NPAS1	GeneID:4861	2400000		NRF1	GeneID:4899	3900000		ZNF75D	GeneID:7626			ADNP	GeneID:23394	25000000
DOT1L	GeneID:84444	13000000		NFATC3	GeneID:4775	9700000		GCFC1	GeneID:94104	27000000		DNAJC2	GeneID:27000	24000000		ZNF644	GeneID:84146	14000000		TCF20	GeneID:6942	18000000
HMGA1	GeneID:3159	660000000		PKNOX1	GeneID:5316	34000000		DOT1L	GeneID:84444	10000000		RB1	GeneID:5925	20000000		PRDM10	GeneID:56980	17000000		FOXG1	GeneID:2290	5000000
HMGA1	GeneID:3159	470000000		CHD6	GeneID:84181	8300000		ZNF420	GeneID:147923			ZNF592	GeneID:9640	15000000		CEBPZ	GeneID:10153	2100000		GATA4	GeneID:2626	17000000
ZNF488	GeneID:118738			ZZZ3	GeneID:26009	16000000		HMGA1	GeneID:3159	630000000		MAZ	GeneID:4150	200000000		RBPJ	GeneID:3516	77000000		TTF1	GeneID:7270	12000000
ZBTB9	GeneID:221504	20000000		FOXK2	GeneID:3607	49000000		HMGA1	GeneID:3159	660000000		C14ORF43	GeneID:91748	3000000		TBX3	GeneID:6926	17000000		ZNF512B	GeneID:57473	66000000
NFRKB	GeneID:4798	53000000		ADNP	GeneID:23394	62000000		HOXA9	GeneID:3205	20000000		ZNF462	GeneID:58499	2400000		SMAD5	GeneID:4090	29000000		YBX1	GeneID:4904	49000000
HOXD11	GeneID:3237	890000		TCF20	GeneID:6942	7000000		ZNF92	GeneID:168374	3500000		MTA1	GeneID:9112	89000000		HMGN1	GeneID:3150	43000000		NR2C2	GeneID:7182	55000000
NOTCH2	GeneID:4853	5800000		GATA4	GeneID:2626	11000000		ZBTB9	GeneID:221504	14000000		UBTF	GeneID:7343	390000000		SALL2	GeneID:6297	9000000		KLF13	GeneID:51621	5300000
ZNF521	GeneID:25925	13000000		TTF1	GeneID:7270	14000000		NFRKB	GeneID:4798	66000000		ZNF143	GeneID:7702	16000000		RREB1	GeneID:6239	22000000		DEAF1	GeneID:10522
ZNF280C	GeneID:55609	12000000		ZNF512B	GeneID:57473	120000000		HOXB6	GeneID:3216	38000000		PKNOX2	GeneID:63876	7000000		HMGXB4	GeneID:10042	20000000		SP1	GeneID:6667	64000000
ZNF687	GeneID:57592	47000000		YBX1	GeneID:4904	57000000		NOTCH2	GeneID:4853	4500000		NFKB2	GeneID:4791			TERF2IP	GeneID:54386	14000000		SP3	GeneID:6670	78000000
ZBTB2	GeneID:57621	6800000		RBL1	GeneID:5933	4500000		ZNF521	GeneID:25925	14000000		SALL1	GeneID:6299	6300000		CHD7	GeneID:55636	86000000		BPTF	GeneID:2186	44000000
HOXA5	GeneID:3202	12000000		NFKB1	GeneID:4790			ZNF280C	GeneID:55609	13000000		ZFHX3	GeneID:463	3700000		ZKSCAN1	GeneID:7586	6100000		GATA6	GeneID:2627	99000000
HOXC4	GeneID:3221	5400000		NR2C2	GeneID:7182	76000000		ZNF687	GeneID:57592	59000000		GLI3	GeneID:2737	8400000		VEZF1	GeneID:7716	44000000		ZFP64	GeneID:55734	19000000
HOXC9	GeneID:3225	12000000		KLF13	GeneID:51621	8700000		ZBTB2	GeneID:57621			FOXC1	GeneID:2296	100000000		ARID2	GeneID:196528	23000000		ZNF644	GeneID:84146	21000000
MLX	GeneID:6945	23000000		TSHZ1	GeneID:10194	1700000		HOXA5	GeneID:3202	11000000		CASZ1	GeneID:54897	7800000		FOXP4	GeneID:116113	29000000		PRDM10	GeneID:56980	5700000
ELF1	GeneID:1997	14000000		SP1	GeneID:6667	63000000		HOXC10	GeneID:3226	4100000		ZNF629	GeneID:23361	30000000		CBX2	GeneID:84733	5500000		SOX13	GeneID:9580	4100000
PBX2	GeneID:5089	65000000		SP3	GeneID:6670	120000000		HOXC9	GeneID:3225	6500000		ZBTB40	GeneID:9923	9600000		ZHX1	GeneID:11244	27000000		ZNF513	GeneID:130557	1700000
NFATC1	GeneID:4772	88000000		BPTF	GeneID:2186	56000000		MLX	GeneID:6945	14000000		HIC2	GeneID:23119	120000000		ZSCAN2	GeneID:54993	46000000		FOXO3	GeneID:2309	4800000
MSX2	GeneID:4488	8000000		GATA6	GeneID:2627	57000000		ELF1	GeneID:1997	10000000		SIX4	GeneID:51804	28000000		NR3C1	GeneID:2908	3800000		CEBPZ	GeneID:10153
NFATC3	GeneID:4775	8300000		ZFP64	GeneID:55734	13000000		PBX2	GeneID:5089	63000000		ZNF148	GeneID:7707	11000000		E4F1	GeneID:1877	25000000		RBPJ	GeneID:3516	87000000
PKNOX1	GeneID:5316	39000000		ZNF644	GeneID:84146	33000000		NFATC1	GeneID:4772	110000000		ZNF768	GeneID:79724	5700000		RFX5	GeneID:5993	15000000		TBX3	GeneID:6926	10000000
CHD6	GeneID:84181	13000000		PRDM10	GeneID:56980	17000000		ZSCAN21	GeneID:7589	14000000		ZNF207	GeneID:7756	140000000		HMGB3	GeneID:3149	140000000		SMAD5	GeneID:4090	30000000
ZZZ3	GeneID:26009	20000000		TCF7	GeneID:6932	1000000		MSX2	GeneID:4488	19000000		SCXB	GeneID:642658	1300000		MYC	GeneID:4609			HMGN1	GeneID:3150	37000000
FOXK2	GeneID:3607	46000000		CEBPZ	GeneID:10153	3600000		NFATC3	GeneID:4775	13000000		FOXP2	GeneID:93986	22000000		ZNF451	GeneID:26036			SALL2	GeneID:6297	10000000
ADNP	GeneID:23394	36000000		RBPJ	GeneID:3516	130000000		ZHX3	GeneID:23051	10000000		WIZ	GeneID:58525	57000000		DMAP1	GeneID:55929	24000000		MTA3	GeneID:57504	9700000
TCF20	GeneID:6942	28000000		ZNF250	GeneID:58500	9100000		PKNOX1	GeneID:5316	100000000		ZNF787	GeneID:126208	19000000		FOXK1	GeneID:221937	200000000		RREB1	GeneID:6239	37000000
FOXG1	GeneID:2290	3100000		ZNF423	GeneID:23090	1100000		BHLHA15	GeneID:168620	10000000		ZBED4	GeneID:9889	6900000		HMG20B	GeneID:10362	16000000		HMGXB4	GeneID:10042	21000000
GATA4	GeneID:2626	17000000		TBX3	GeneID:6926	7100000		CHD6	GeneID:84181	7500000		ZNF146	GeneID:7705	28000000		MNX1	GeneID:3110	11000000		POU3F2	GeneID:5454	6700000
TTF1	GeneID:7270	4000000		SMAD5	GeneID:4090	65000000		ZZZ3	GeneID:26009	30000000		REPIN1	GeneID:29803	8900000		TRPS1	GeneID:7227	2500000		ZNF740	GeneID:283337	5300000
ZNF512B	GeneID:57473	160000000		HMGN1	GeneID:3150	200000000		EBF1	GeneID:1879	53000000		TADA2B	GeneID:93624	9000000		BAZ2A	GeneID:11176	5800000		ZNF620	GeneID:253639	1400000
YBX1	GeneID:4904	100000000		SALL2	GeneID:6297	24000000		FOXK2	GeneID:3607	97000000		RLF	GeneID:6018	2200000		NRF1	GeneID:4899	16000000		TERF2IP	GeneID:54386	20000000
RBL1	GeneID:5933	7200000		MTA3	GeneID:57504	18000000		ADNP	GeneID:23394	66000000		ZFP64	GeneID:55734	15000000		RB1	GeneID:5925	32000000		EBF3	GeneID:253738	40000000
NR2C2	GeneID:7182	80000000		SMAD2	GeneID:4087	6900000		TCF20	GeneID:6942	24000000		GATAD2A	GeneID:54815	110000000		ZNF592	GeneID:9640	11000000		CHD7	GeneID:55636	130000000
KLF13	GeneID:51621	12000000		RREB1	GeneID:6239	46000000		FOXG1	GeneID:2290	4500000		ZBTB11	GeneID:27107	3200000		E2F6	GeneID:1876	8800000		ALX4	GeneID:60529	9200000
DEAF1	GeneID:10522	5600000		HMGXB4	GeneID:10042	31000000		GATA4	GeneID:2626	21000000		ZBTB17	GeneID:7709	5700000		MAZ	GeneID:4150	250000000		ZNF658	GeneID:26149	7500000
SP1	GeneID:6667	68000000		POU3F2	GeneID:5454	11000000		TTF1	GeneID:7270	23000000		HOXA10	GeneID:3206			MLXIP	GeneID:22877	9000000		ZKSCAN1	GeneID:7586	11000000
SP3	GeneID:6670	150000000		ZNF740	GeneID:283337	15000000		ZNF512B	GeneID:57473	150000000		SMAD9	GeneID:4093	97000000		C14ORF43	GeneID:91748	51000000		VEZF1	GeneID:7716	26000000
ZNF362	GeneID:149076	2700000		TERF2IP	GeneID:54386	15000000		YBX1	GeneID:4904	90000000		TP53	GeneID:7157	200000000		EBF2	GeneID:64641	26000000		ARID2	GeneID:196528	23000000
BPTF	GeneID:2186	75000000		EBF3	GeneID:253738	42000000		CREM	GeneID:1390	20000000		ZNF469	GeneID:84627	55000000		ZNF462	GeneID:58499	29000000		FOXP4	GeneID:116113	41000000
GATA6	GeneID:2627	98000000		CHD7	GeneID:55636	190000000		RBL1	GeneID:5933	3900000		SMARCC1	GeneID:6599	180000000		MTA1	GeneID:9112	53000000		CBX2	GeneID:84733	5400000
ZFP64	GeneID:55734	28000000		ALX4	GeneID:60529	13000000		NFKB1	GeneID:4790	3000000		UBP1	GeneID:7342	100000000		ZNF143	GeneID:7702	16000000		ZHX1	GeneID:11244	19000000
ZNF644	GeneID:84146	28000000		ZKSCAN1	GeneID:7586	14000000		NR2C2	GeneID:7182	98000000		NR2C1	GeneID:7181	13000000		SALL1	GeneID:6299	17000000		ZSCAN2	GeneID:54993
PRDM10	GeneID:56980	26000000		VEZF1	GeneID:7716	39000000		KLF13	GeneID:51621	15000000		ZNF24	GeneID:7572	71000000		ZFHX3	GeneID:463	7200000		E4F1	GeneID:1877	31000000
SOX13	GeneID:9580	6300000		ARID2	GeneID:196528	29000000		MLX	GeneID:6945	6800000		HMGB2	GeneID:3148	140000000		ZIC5	GeneID:85416	6600000		RFX5	GeneID:5993	15000000
CEBPZ	GeneID:10153	5500000		FOXP4	GeneID:116113	56000000		SP1	GeneID:6667	140000000		HES4	GeneID:57801			GLI3	GeneID:2737	12000000		HMGB3	GeneID:3149	140000000
FOXM1	GeneID:2305	14000000		CBX2	GeneID:84733	14000000		SP3	GeneID:6670	170000000		BBX	GeneID:56987	25000000		FOXC1	GeneID:2296	110000000		ARNTL	GeneID:406	3600000
RBPJ	GeneID:3516	150000000		FOXB2	GeneID:442425	3500000		ZNF362	GeneID:149076	2600000		NFYC	GeneID:4802	17000000		CASZ1	GeneID:54897	23000000		DMAP1	GeneID:55929	31000000
ZNF784	GeneID:147808	13000000		ZHX1	GeneID:11244	30000000		BPTF	GeneID:2186	6200000		C17ORF49	GeneID:124944	62000000		ZNF629	GeneID:23361	10000000		FOXK1	GeneID:221937	47000000
TCF12	GeneID:6938	4300000		NR3C1	GeneID:2908	3100000		BPTF	GeneID:2186			NFIA	GeneID:4774	15000000		SP2	GeneID:6668	8400000		GON4L	GeneID:54856	4700000
TBX3	GeneID:6926	2700000		E4F1	GeneID:1877	39000000		GATA6	GeneID:2627	100000000		CSDA	GeneID:8531	15000000		FOXD2	GeneID:2306	11000000		HMG20B	GeneID:10362	22000000
MXI1	GeneID:4601	17000000		RFX5	GeneID:5993	37000000		ZFP64	GeneID:55734	23000000		RFX1	GeneID:5989	34000000		HIC2	GeneID:23119	160000000		GATAD1	GeneID:57798	8600000
SMAD5	GeneID:4090	47000000		HMGB3	GeneID:3149	270000000		ZNF644	GeneID:84146	48000000		ZNF828	GeneID:283489	30000000		SIX4	GeneID:51804	25000000		MNX1	GeneID:3110	12000000
HMGN1	GeneID:3150	51000000		MYC	GeneID:4609	4100000		PRDM10	GeneID:56980	30000000		MGA	GeneID:23269	15000000		ZNF148	GeneID:7707	33000000		TRPS1	GeneID:7227	25000000
SALL2	GeneID:6297	25000000		DMAP1	GeneID:55929	51000000		FOXO3	GeneID:2309	4600000		ZBTB24	GeneID:9841	4300000		ZNF655	GeneID:79027	3700000		BAZ2A	GeneID:11176	13000000
MTA3	GeneID:57504	16000000		FOXK1	GeneID:221937	72000000		CEBPZ	GeneID:10153	1700000		DACH1	GeneID:1602	81000000		ZNF768	GeneID:79724	12000000		NRF1	GeneID:4899	24000000
SMAD2	GeneID:4087	4400000		GON4L	GeneID:54856	29000000		RBPJ	GeneID:3516	140000000		TADA2A	GeneID:6871	8500000		PRDM9	GeneID:56979			PRDM15	GeneID:63977
RREB1	GeneID:6239	60000000		HMG20B	GeneID:10362	25000000		C2ORF3	GeneID:6936	11000000		AHCTF1	GeneID:25909	16000000		GBX1	GeneID:2636	2000000		FOXO4	GeneID:4303	3900000
HMGXB4	GeneID:10042	47000000		GLI2	GeneID:2736	850000		ZNF238	GeneID:10472			ZNF224	GeneID:7767	1900000		FOXP2	GeneID:93986	11000000		RB1	GeneID:5925	35000000
POU3F2	GeneID:5454	21000000		GATAD1	GeneID:57798	24000000		PHOX2A	GeneID:401	180000		SATB2	GeneID:23314	18000000		ZNF292	GeneID:23036	4500000		ZNF592	GeneID:9640	25000000
ZNF740	GeneID:283337	17000000		MNX1	GeneID:3110	20000000		ZFAT	GeneID:57623			ZFHX4	GeneID:79776	19000000		WIZ	GeneID:58525	100000000		ZBTB44	GeneID:29068	11000000
ZNF620	GeneID:253639	4200000		TRPS1	GeneID:7227	36000000		TBX3	GeneID:6926	12000000		TFDP2	GeneID:7029	7500000		ZNF787	GeneID:126208	12000000		E2F6	GeneID:1876	17000000
TERF2IP	GeneID:54386	22000000		BAZ2A	GeneID:11176	22000000		MXI1	GeneID:4601	29000000		ARID1B	GeneID:57492	16000000		ZBED4	GeneID:9889	6300000		ZSCAN29	GeneID:146050	4400000
EBF3	GeneID:253738	59000000		SNAPC4	GeneID:6621			SMAD5	GeneID:4090	59000000		ZNF268	GeneID:10795			PRR12	GeneID:57479	33000000		MAZ	GeneID:4150	260000000
CHD7	GeneID:55636	240000000		NRF1	GeneID:4899	19000000		HMGN1	GeneID:3150	64000000		SATB1	GeneID:6304	37000000		ZNF146	GeneID:7705	23000000		POU3F1	GeneID:5453
ALX4	GeneID:60529	13000000		PRDM15	GeneID:63977	9200000		SALL2	GeneID:6297	29000000		GABPA	GeneID:2551	23000000		REPIN1	GeneID:29803			NKX6-1	GeneID:4825	6400000
ZKSCAN1	GeneID:7586	1400000		RB1	GeneID:5925	53000000		MTA3	GeneID:57504	13000000		POU2F1	GeneID:5451	94000000		TADA2B	GeneID:93624	2800000		MLXIP	GeneID:22877	14000000
VEZF1	GeneID:7716	43000000		ZNF592	GeneID:9640	30000000		RREB1	GeneID:6239	59000000		FOXJ3	GeneID:22887	2800000		SMARCA1	GeneID:6594	4300000		RYBP	GeneID:23429	4500000
ARID2	GeneID:196528	38000000		ZBTB44	GeneID:29068	7700000		HMGXB4	GeneID:10042	41000000		HMGN3	GeneID:9324	69000000		GATAD2A	GeneID:54815	77000000		C14ORF43	GeneID:91748	64000000
FOXP4	GeneID:116113	84000000		E2F6	GeneID:1876	27000000		POU3F2	GeneID:5454	20000000		CUX1	GeneID:1523	70000000		ZBTB11	GeneID:27107	4500000		ZNF462	GeneID:58499	32000000
CBX2	GeneID:84733	19000000		ZSCAN29	GeneID:146050	4100000		ZNF740	GeneID:283337	16000000		SMARCA5	GeneID:8467	190000000		ZBTB17	GeneID:7709	5300000		MTA1	GeneID:9112	57000000
ZHX1	GeneID:11244	25000000		MAZ	GeneID:4150	500000000		TERF2IP	GeneID:54386	20000000						ZKSCAN2	GeneID:342357	15000000		UBTF	GeneID:7343	15000000
NR3C1	GeneID:2908	5200000		NKX6-1	GeneID:4825	12000000		EBF3	GeneID:253738	54000000						HOXA10	GeneID:3206	5500000		ZNF143	GeneID:7702	15000000
ZNF711	GeneID:7552	9200000		MLXIP	GeneID:22877	24000000		CHD7	GeneID:55636	230000000						TP53	GeneID:7157	150000000		CUX2	GeneID:23316	41000000
E4F1	GeneID:1877	53000000		C14ORF43	GeneID:91748	37000000		ALX4	GeneID:60529	18000000						SMARCC1	GeneID:6599	60000000		HOXD13	GeneID:3239	4200000
RFX5	GeneID:5993	35000000		ZNF462	GeneID:58499	30000000		ZKSCAN1	GeneID:7586	15000000						UBP1	GeneID:7342	96000000		HMX1	GeneID:3166	5100000
HMGB3	GeneID:3149	310000000		MTA1	GeneID:9112	86000000		VEZF1	GeneID:7716	51000000						NR2C1	GeneID:7181	11000000		PKNOX2	GeneID:63876
ZNF609	GeneID:23060	6300000		UBTF	GeneID:7343	27000000		ARID2	GeneID:196528	42000000						ZNF24	GeneID:7572	88000000		NFKB2	GeneID:4791	4700000
ARNTL	GeneID:406	7400000		ZNF143	GeneID:7702	10000000		ZNF121	GeneID:7675	6600000						HMGB2	GeneID:3148	80000000		SALL1	GeneID:6299	17000000
DMAP1	GeneID:55929	52000000		CUX2	GeneID:23316	4900000		FOXP4	GeneID:116113	90000000						MEF2A	GeneID:4205	9100000		ZFHX3	GeneID:463	7800000
FOXK1	GeneID:221937	390000000		HOXD13	GeneID:3239	14000000		CBX2	GeneID:84733	12000000						BBX	GeneID:56987	7700000		ZIC5	GeneID:85416	7000000
GON4L	GeneID:54856	10000000		HMX1	GeneID:3166	12000000		ZHX1	GeneID:11244	36000000						NFYC	GeneID:4802	44000000		GLI3	GeneID:2737	17000000
HMG20B	GeneID:10362	37000000		NFKB2	GeneID:4791	5400000		ZSCAN2	GeneID:54993	460000000						C17ORF49	GeneID:124944	71000000		FOXC1	GeneID:2296	70000000
GATAD1	GeneID:57798	21000000		SALL1	GeneID:6299	25000000		NR3C1	GeneID:2908	1400000						RARA	GeneID:5914	5000000		CASZ1	GeneID:54897	24000000
MNX1	GeneID:3110	28000000		ZFHX3	GeneID:463	13000000		SP4	GeneID:6671	11000000						NFIA	GeneID:4774	36000000		ZNF629	GeneID:23361	22000000
TRPS1	GeneID:7227	31000000		GLI3	GeneID:2737	27000000		E4F1	GeneID:1877	59000000						TCF7L2	GeneID:6934	20000000		SP2	GeneID:6668	7000000
BAZ2A	GeneID:11176	29000000		FOXC1	GeneID:2296	83000000		RFX5	GeneID:5993	41000000						RFX1	GeneID:5989	25000000		TSHZ3	GeneID:57616	3200000
SNAPC4	GeneID:6621			CASZ1	GeneID:54897	18000000		HMGB3	GeneID:3149	330000000						ZNF828	GeneID:283489	6900000		FOXD2	GeneID:2306	9300000
NRF1	GeneID:4899	29000000		ZNF629	GeneID:23361	43000000		MYC	GeneID:4609	17000000						MGA	GeneID:23269	61000000		ZBTB40	GeneID:9923	2900000
PRDM15	GeneID:63977	9100000		SP2	GeneID:6668	8500000		ARNTL	GeneID:406	6400000						ZBTB24	GeneID:9841	12000000		HIC2	GeneID:23119	200000000
RB1	GeneID:5925	38000000		TSHZ3	GeneID:57616	7700000		ZNF451	GeneID:26036	1900000						DACH1	GeneID:1602	50000000		SIX4	GeneID:51804	28000000
ZNF592	GeneID:9640	32000000		ZBTB40	GeneID:9923	17000000		DMAP1	GeneID:55929	50000000						AHCTF1	GeneID:25909	25000000		ZNF148	GeneID:7707	44000000
ZBTB44	GeneID:29068	8200000		HIC2	GeneID:23119	210000000		FOXK1	GeneID:221937	82000000						SATB2	GeneID:23314	30000000		ZNF655	GeneID:79027	2100000
E2F6	GeneID:1876	30000000		SIX4	GeneID:51804	43000000		GON4L	GeneID:54856	6300000						ZFHX4	GeneID:79776	18000000		ZNF768	GeneID:79724	13000000
MAZ	GeneID:4150	410000000		ZNF148	GeneID:7707	72000000		HMG20B	GeneID:10362	33000000						TFDP2	GeneID:7029	7100000		ZNF207	GeneID:7756	58000000
MLXIP	GeneID:22877	14000000		ZNF655	GeneID:79027	4900000		GATAD1	GeneID:57798	12000000						TEAD1	GeneID:7003	7400000		GBX1	GeneID:2636	1200000
RYBP	GeneID:23429	6700000		ZNF768	GeneID:79724	13000000		MNX1	GeneID:3110	28000000						SATB1	GeneID:6304	26000000		ZBTB34	GeneID:403341	16000000
CIC	GeneID:23152			ZNF207	GeneID:7756	60000000		TRPS1	GeneID:7227	47000000						GABPA	GeneID:2551	20000000		FOXP2	GeneID:93986	13000000
C14ORF43	GeneID:91748	120000000		ZBTB34	GeneID:403341	8600000		BAZ2A	GeneID:11176	26000000						POU2F1	GeneID:5451	79000000		ZNF292	GeneID:23036	4000000
ZNF462	GeneID:58499	52000000		FOXP2	GeneID:93986	20000000		NRF1	GeneID:4899	36000000						FOXJ3	GeneID:22887			WIZ	GeneID:58525	110000000
ISL1	GeneID:3670	9200000		ZNF292	GeneID:23036	7000000		PRDM15	GeneID:63977	4300000						TGIF2	GeneID:60436	34000000		ZNF787	GeneID:126208	16000000
MTA1	GeneID:9112	95000000		WIZ	GeneID:58525	140000000		DNAJC2	GeneID:27000	2900000						OTX1	GeneID:5013	2600000		ZBED4	GeneID:9889	5900000
UBTF	GeneID:7343			ZNF787	GeneID:126208	29000000		ZXDC	GeneID:79364	16000000						HMGN3	GeneID:9324	120000000		PRR12	GeneID:57479	31000000
ZNF143	GeneID:7702	130000000		ZBED4	GeneID:9889	17000000		JUND	GeneID:3727	8700000						CUX1	GeneID:1523	88000000		ZNF146	GeneID:7705	18000000
CUX2	GeneID:23316	700000		PRR12	GeneID:57479	48000000		FOXO4	GeneID:4303	6100000						VDR	GeneID:7421	7000000		REPIN1	GeneID:29803
HOXD13	GeneID:3239	6600000		ZNF146	GeneID:7705	18000000		ZNF229	GeneID:7772	9100000						ZNF664	GeneID:144348	5100000		ERF	GeneID:2077	2800000
HIVEP1	GeneID:3096	1800000		REPIN1	GeneID:29803	5300000		RB1	GeneID:5925	59000000						SMARCA5	GeneID:8467	220000000		TADA2B	GeneID:93624	4500000
HMX1	GeneID:3166	13000000		ZNF593	GeneID:51042	2600000		ZNF592	GeneID:9640	36000000										RLF	GeneID:6018
NFKB2	GeneID:4791	5300000		YY2	GeneID:404281	8000000		ZBTB44	GeneID:29068	5400000										HOMEZ	GeneID:57594	1200000
NR1I3	GeneID:9970			TADA2B	GeneID:93624	14000000		E2F6	GeneID:1876	24000000										NFAT5	GeneID:10725	19000000
SALL1	GeneID:6299	24000000		RLF	GeneID:6018	3200000		ZSCAN29	GeneID:146050	5200000										SMARCA1	GeneID:6594	2700000
ZFHX3	GeneID:463	16000000		NFAT5	GeneID:10725	15000000		MAZ	GeneID:4150	610000000										GATAD2A	GeneID:54815	75000000
ZIC5	GeneID:85416	8000000		SMARCA1	GeneID:6594	14000000		ZFPM1	GeneID:161882											ZBTB11	GeneID:27107	4000000
ZFP1	GeneID:162239	2500000		GATAD2A	GeneID:54815	88000000		ZNF579	GeneID:163033	1800000										ZBTB17	GeneID:7709	7600000
GLI3	GeneID:2737	35000000		ZBTB11	GeneID:27107	5700000		NKX6-1	GeneID:4825	12000000										ZBTB1	GeneID:22890	1800000
FOXC1	GeneID:2296	76000000		ZBTB17	GeneID:7709	16000000		MLXIP	GeneID:22877	27000000										HOXA10	GeneID:3206	17000000
CASZ1	GeneID:54897	21000000		ZBTB1	GeneID:22890	2100000		RYBP	GeneID:23429	7100000										ELF4	GeneID:2000	4600000
ZNF629	GeneID:23361	41000000		HOXA10	GeneID:3206	18000000		CIC	GeneID:23152	1100000										SMAD9	GeneID:4093	2100000
UNCX	GeneID:340260	12000000		ELF4	GeneID:2000	17000000		C14ORF43	GeneID:91748	110000000										TP53	GeneID:7157	200000000
TSHZ3	GeneID:57616	5600000		SMAD9	GeneID:4093	9000000		EBF2	GeneID:64641	61000000										SMARCC1	GeneID:6599	55000000
FOXD2	GeneID:2306	15000000		TP53	GeneID:7157	240000000		ZNF462	GeneID:58499	59000000										TERF1	GeneID:7013	7000000
ZBTB40	GeneID:9923	5800000		SMARCC1	GeneID:6599	120000000		ISL1	GeneID:3670	15000000										UBP1	GeneID:7342	110000000
HIC2	GeneID:23119	260000000		TERF1	GeneID:7013	9200000		MTA1	GeneID:9112	89000000										NR2C1	GeneID:7181	14000000
SIX4	GeneID:51804	33000000		UBP1	GeneID:7342	140000000		UBTF	GeneID:7343	60000000										ZNF267	GeneID:10308	5200000
ZNF148	GeneID:7707	75000000		NR2C1	GeneID:7181	21000000		ZNF143	GeneID:7702	37000000										ZNF24	GeneID:7572	100000000
ZNF655	GeneID:79027	16000000		ZNF24	GeneID:7572	150000000		HOXD13	GeneID:3239	15000000										HMGB2	GeneID:3148	130000000
ZNF768	GeneID:79724	16000000		ZNF195	GeneID:7748			HMX1	GeneID:3166	12000000										MEF2A	GeneID:4205	8600000
ZNF207	GeneID:7756	83000000		HMGB2	GeneID:3148	270000000		PKNOX2	GeneID:63876	6900000										TBX2	GeneID:6909	13000000
RFX7	GeneID:64864	2800000		ZNF384	GeneID:171017	11000000		NFKB2	GeneID:4791	6400000										PBX3	GeneID:5090	23000000
GBX1	GeneID:2636	3800000		ZBTB43	GeneID:23099	20000000		SALL1	GeneID:6299	24000000										ZNF384	GeneID:171017	8800000
FOXP2	GeneID:93986	28000000		BBX	GeneID:56987	23000000		ZFHX3	GeneID:463	11000000										NFATC4	GeneID:4776	3500000
ZNF292	GeneID:23036	6000000		NFYC	GeneID:4802	73000000		ZIC5	GeneID:85416	8400000										BBX	GeneID:56987	22000000
WIZ	GeneID:58525	140000000		C17ORF49	GeneID:124944	53000000		ZNF777	GeneID:27153	1600000										NFYC	GeneID:4802	48000000
ZNF787	GeneID:126208	27000000		C17ORF49	GeneID:124944	4300000		GLI3	GeneID:2737	36000000										C17ORF49	GeneID:124944	71000000
IRF2	GeneID:3660	15000000		ZNF572	GeneID:137209	85000000		FOXC1	GeneID:2296	100000000										NR2F2	GeneID:7026	34000000
ZBED4	GeneID:9889	26000000		RARA	GeneID:5914	33000000		CASZ1	GeneID:54897	43000000										RARA	GeneID:5914	11000000
PRR12	GeneID:57479	52000000		NFIA	GeneID:4774	18000000		ZNF629	GeneID:23361	47000000										NFIA	GeneID:4774	26000000
ZNF146	GeneID:7705	16000000		CSDA	GeneID:8531	5300000		UNCX	GeneID:340260	11000000										CSDA	GeneID:8531	9600000
REPIN1	GeneID:29803	13000000		TCF7L2	GeneID:6934	39000000		SP2	GeneID:6668	17000000										GATA2	GeneID:2624	1100000
ZNF593	GeneID:51042	2700000		ESRRB	GeneID:2103	9100000		TSHZ3	GeneID:57616	5900000										ZNF414	GeneID:84330	4700000
ERF	GeneID:2077	14000000		RFX1	GeneID:5989	34000000		FOXD2	GeneID:2306	17000000										TCF7L2	GeneID:6934	5600000
TADA2B	GeneID:93624	6700000		ZNF828	GeneID:283489	11000000		ZBTB40	GeneID:9923	19000000										ESRRB	GeneID:2103
RLF	GeneID:6018	4700000		MGA	GeneID:23269	94000000		HIC2	GeneID:23119	290000000										RFX1	GeneID:5989	23000000
ZNF142	GeneID:7701	4200000		ZBTB24	GeneID:9841	14000000		SIX4	GeneID:51804	54000000										ZNF828	GeneID:283489	10000000
NFAT5	GeneID:10725	24000000		DACH1	GeneID:1602	76000000		ZNF148	GeneID:7707	87000000										MGA	GeneID:23269	57000000
SMARCA1	GeneID:6594	27000000		NPAS3	GeneID:64067			ZNF768	GeneID:79724	13000000										ZBTB24	GeneID:9841	16000000
GATAD2A	GeneID:54815	110000000		TADA2A	GeneID:6871	4800000		ZNF207	GeneID:7756	79000000										DACH1	GeneID:1602	72000000
ZBTB11	GeneID:27107	8000000		AHCTF1	GeneID:25909	30000000		RFX7	GeneID:64864	8100000										AHCTF1	GeneID:25909	27000000
ZBTB17	GeneID:7709	7800000		MEF2A	GeneID:4205	18000000		NOTCH1	GeneID:4851	2900000										ZBED1	GeneID:9189	1300000
ZBTB1	GeneID:22890	2400000		SATB2	GeneID:23314	74000000		GBX1	GeneID:2636											MEF2A	GeneID:4205	80000000
HOXA10	GeneID:3206	8200000		ZFHX4	GeneID:79776	29000000		ZBTB34	GeneID:403341	5600000										SATB2	GeneID:23314	29000000
ELF4	GeneID:2000	6900000		TFDP2	GeneID:7029	12000000		FOXP2	GeneID:93986	42000000										ZFHX4	GeneID:79776	24000000
SMAD9	GeneID:4093	10000000		TEAD1	GeneID:7003	31000000		ZNF292	GeneID:23036	4700000										TFDP2	GeneID:7029	8200000
TP53	GeneID:7157	300000000		MYNN	GeneID:55892	2400000		WIZ	GeneID:58525	190000000										TEAD1	GeneID:7003	23000000
SMARCC1	GeneID:6599	120000000		NFIB	GeneID:4781	3500000		ZNF787	GeneID:126208	13000000										MYNN	GeneID:55892	3200000
TERF1	GeneID:7013	13000000		SATB1	GeneID:6304	50000000		IRF2	GeneID:3660	21000000										THRA	GeneID:7067	17000000
UBP1	GeneID:7342	170000000		GABPA	GeneID:2551	42000000		ZBED4	GeneID:9889	27000000										ZNF28	GeneID:7576	3800000
NR2C1	GeneID:7181	23000000		POU2F1	GeneID:5451	47000000		PRR12	GeneID:57479	57000000										SATB1	GeneID:6304	31000000
ZNF267	GeneID:10308	6700000		FOXJ3	GeneID:22887	8500000		ZNF146	GeneID:7705	33000000										GABPA	GeneID:2551	36000000
ZNF24	GeneID:7572	210000000		TGIF2	GeneID:60436	24000000		REPIN1	GeneID:29803	9800000										POU2F1	GeneID:5451	55000000
HMGB2	GeneID:3148	270000000		OTX1	GeneID:5013	5200000		ZNF593	GeneID:51042											ZNF549	GeneID:256051	10000000
TBX2	GeneID:6909	5300000		CUX1	GeneID:1523	88000000		ERF	GeneID:2077											TGIF2	GeneID:60436	23000000
ZNF384	GeneID:171017	14000000		VDR	GeneID:7421	12000000		ZNF219	GeneID:51222	9700000										OTX1	GeneID:5013	2000000
ZBTB43	GeneID:23099	51000000		RBAK	GeneID:57786	2700000		TADA2B	GeneID:93624	20000000										HMGN3	GeneID:9324
ZNF646	GeneID:9726	2000000		SMARCA5	GeneID:8467	310000000		RLF	GeneID:6018	2100000										CUX1	GeneID:1523	110000000
BBX	GeneID:56987	43000000						ZNF187	GeneID:7741	5300000										VDR	GeneID:7421	11000000
NFYC	GeneID:4802	57000000						ZFP64	GeneID:55734	12000000										SMARCA5	GeneID:8467	220000000
C17ORF49	GeneID:124944	90000000						NFAT5	GeneID:10725	15000000
C17ORF49	GeneID:124944	7300000						SMARCA1	GeneID:6594	26000000
ZNF572	GeneID:137209	98000000						GATAD2A	GeneID:54815	120000000
RARA	GeneID:5914	44000000						ZBTB11	GeneID:27107	8300000
CRAMP1L	GeneID:57585							ZBTB17	GeneID:7709	21000000
NFIA	GeneID:4774	27000000						ZNF624	GeneID:57547	2700000
CSDA	GeneID:8531	12000000						ZBTB1	GeneID:22890	1900000
GATA2	GeneID:2624	1700000						HOXA10	GeneID:3206	27000000
TCF7L2	GeneID:6934	40000000						ELF4	GeneID:2000	24000000
NKX1-2	GeneID:390010	44000000						GFI1	GeneID:2672	2700000
ESRRB	GeneID:2103	3600000						SMAD9	GeneID:4093	4900000
RFX1	GeneID:5989	60000000						TP53	GeneID:7157	340000000
ZNF828	GeneID:283489	13000000						SMARCC1	GeneID:6599	120000000
MGA	GeneID:23269	120000000						TERF1	GeneID:7013	6100000
ZNF208	GeneID:7757							UBP1	GeneID:7342	200000000
ZBTB24	GeneID:9841	21000000						NR2C1	GeneID:7181	31000000
DACH1	GeneID:1602	100000000						ZNF24	GeneID:7572	150000000
TADA2A	GeneID:6871	7600000						HMGB2	GeneID:3148	250000000
AHCTF1	GeneID:25909	39000000						MEF2A	GeneID:4205
MEF2A	GeneID:4205	23000000						TBX2	GeneID:6909	3800000
PRDM16	GeneID:63976	13000000						HSF2	GeneID:3298	5100000
SATB2	GeneID:23314	92000000						ZNF384	GeneID:171017	12000000
ZFHX4	GeneID:79776	82000000						ZBTB43	GeneID:23099	30000000
TFCP2	GeneID:7024	19000000						NFATC4	GeneID:4776	3200000
TFDP2	GeneID:7029	9000000						ZNF646	GeneID:9726	2600000
TEAD1	GeneID:7003	18000000						BBX	GeneID:56987	39000000
ARID1B	GeneID:57492	7900000						NFYC	GeneID:4802	85000000
MYNN	GeneID:55892	2500000						C17ORF49	GeneID:124944	81000000
NFIB	GeneID:4781	2700000						C17ORF49	GeneID:124944	9700000
THRA	GeneID:7067	19000000						SIX2	GeneID:10736	1900000
SATB1	GeneID:6304	55000000						ZNF572	GeneID:137209	78000000
GABPA	GeneID:2551	47000000						NFIA	GeneID:4774	41000000
POU2F1	GeneID:5451	90000000						CSDA	GeneID:8531	2600000
FOXJ3	GeneID:22887	4700000						GATA2	GeneID:2624	2000000
TGIF2	GeneID:60436	28000000						ZNF414	GeneID:84330	8200000
OTX1	GeneID:5013	5500000						TCF7L2	GeneID:6934	28000000
HMGN3	GeneID:9324	64000000						ESRRB	GeneID:2103	79000000
CUX1	GeneID:1523	110000000						RFX1	GeneID:5989	58000000
VDR	GeneID:7421	8500000						ZNF828	GeneID:283489	18000000
RBAK	GeneID:57786	2900000						MGA	GeneID:23269	130000000
SMARCA5	GeneID:8467	340000000						ZNF44	GeneID:51710
								HNF1A	GeneID:6927
								ZBTB24	GeneID:9841	20000000
								DACH1	GeneID:1602	100000000
								TADA2A	GeneID:6871	12000000
								AHCTF1	GeneID:25909	38000000
								ZBED1	GeneID:9189	2400000
								MEF2A	GeneID:4205	21000000
								PPARD	GeneID:5467	2800000
								SATB2	GeneID:23314	87000000
								ZNF653	GeneID:115950
								ZFHX4	GeneID:79776	83000000
								TFCP2	GeneID:7024	21000000
								DLX6	GeneID:1750	42000000
								ZFX	GeneID:7543	8600000
								TFDP2	GeneID:7029	17000000
								TEAD1	GeneID:7003	44000000
								MYNN	GeneID:55892	2600000
								NFIB	GeneID:4781	15000000
								THRA	GeneID:7067	12000000
								REST	GeneID:5978	7300000
								SATB1	GeneID:6304	63000000
								GABPA	GeneID:2551	64000000
								POU2F1	GeneID:5451	76000000
								FOXJ3	GeneID:22887	29000000
								TGIF2	GeneID:60436	41000000
								OTX1	GeneID:5013	4700000
								HMGN3	GeneID:9324	5300000
								CUX1	GeneID:1523	150000000
								VDR	GeneID:7421	23000000
								RBAK	GeneID:57786	2100000
								SMARCA5	GeneID:8467	400000000
